# Supplementary material
Source: publisher figshare collection journal article supplement (https://tandf.figshare.com/ndownloader/files/13627034)
Supplement: Supplementary file 1 [file 13627034]

Table 1S Miseq sequencing generated 11 OTUs that classifed as Fusarium.

| OTU | sample | | F | P | sample | | F | P | sample | | F | P |
| --- | --- | --- | --- | --- | --- | --- | --- | --- | --- | --- | --- | --- |
| 30dayCK | 30dayJY | 50dayCK | 50dayJY | 70dayCK | 70dayJY |
| OTU308 | 0.33 | 0.00 | 1.000 | 0.374 | 0.67 | 0.00 | 1.000 | 0.374 | 0.33 | 0.00 | 1.000 | 0.374 |
| OTU286 | 0.00 | 0.00 | / | / | 0.67 | 0.00 | / | 0.116 | 0.67 | 0.00 | 4.000 | 0.116 |
| OTU280 | 0.00 | 0.33 | 1.000 | 0.374 | 0.33 | 0.00 | 1.000 | 0.374 | 1.00 | 0.00 | 1.000 | 0.158 |
| OTU269 | 0.00 | 0.00 | / | / | 1.00 | 0.00 | / | 0.374 | 1.00 | 0.00 | 1.000 | 0.374 |
| OTU934 | 0.67 | 0.00 | 1.000 | 0.374 | 2.00 | 0.33 | 1.000 | 0.346 | 1.00 | 0.00 | 1.136 | 0.158 |
| OTU239 | 2.00 | 0.00 | 12.000 | 0.026* | 2.33 | 0.00 | 12.000 | 0.002** | 1.00 | 0.00 | 49.000 | 0.158 |
| OTU212 | 2.67 | 0.67 | 4.500 | 0.101 | 3.33 | 0.33 | 4.500 | 0.003** | 4.67 | 1.67 | 40.500 | 0.114 |
| OTU430 | 4.33 | 1.67 | 3.200 | 0.148 | 8.33 | 0.33 | 3.200 | 0.030* | 4.67 | 0.33 | 10.868 | 0.004** |
| OTU323 | 205.00 | 30.00 | 334.091 | 0.000** | 198.00 | 18.67 | 334.091 | 0.001** | 192.00 | 21.00 | 70.356 | 0.005** |
| OTU575 | 189.67 | 33.00 | 15.060 | 0.018* | 192.67 | 28.00 | 15.060 | 0.034* | 290.67 | 35.00 | 10.021 | 0.021* |

(*P<0.05，**P<0.01)

Table 2S Miseq sequencing generated 12 OTU as Bacillus

| OTU | sample | | F | P | sample | | F | P | sample | | F | P |
| --- | --- | --- | --- | --- | --- | --- | --- | --- | --- | --- | --- | --- |
| 30dayCK | 30dayJY | 50dayCK | 50dayJY | 70dayCK | 70dayJY |
| OTU3008 | 0.00 | 0.00 | / | / | 1.00 | 0.33 | 1.000 | 0.374 | 0.67 | 0.33 | 0.500 | 0.519 |
| OTU325 | 48.00 | 2.33 | 28.013 | 0.006** | 31.33 | 2.00 | 69.143 | 0.001** | 37.33 | 2.00 | 9.332 | 0.038* |
| OTU686 | 5.67 | 1.00 | 49.000 | 0.002** | 7.33 | 2.00 | 11.636 | 0.027* | 8.00 | 2.00 | 5.143 | 0.086 |
| OTU1442 | 0.33 | 0.33 | 0.000 | 1.000 | 0.33 | 0.00 | 1.000 | 0.374 | 1.33 | 0.00 | 2.286 | 0.205 |
| OTU1876 | 21.33 | 7.67 | 38.205 | 0.003** | 15.67 | 12.00 | 1.984 | 0.232 | 22.00 | 17.67 | 0.480 | 0.526 |
| OTU514 | 43.00 | 5.00 | 58.541 | 0.002** | 51.67 | 7.00 | 20.545 | 0.011* | 39.67 | 5.33 | 26.066 | 0.007** |
| OTU3880 | 10.67 | 4.33 | 21.235 | 0.010** | 7.00 | 8.00 | 0.086 | 0.784 | 10.00 | 7.33 | 1.306 | 0.317 |
| OTU701 | 23.67 | 3.00 | 17.963 | 0.013* | 23.67 | 2.00 | 20.024 | 0.011* | 20.33 | 2.33 | 16.022 | 0.016* |
| OTU4234 | 2.33 | 1.00 | 16.000 | 0.016* | 2.67 | 0.67 | 4.500 | 0.101 | 3.33 | 1.33 | 2.118 | 0.219 |
| OTU1893 | 2.67 | 2.67 | 0.000 | 1.000 | 1.67 | 2.33 | .200 | 0.678 | 2.00 | 2.00 | 0.000 | 1.000 |
| OTU3824 | 1.33 | 0.33 | 4.500 | 0.101 | 0.67 | 2.67 | 2.571 | 0.184 | 1.67 | 1.33 | .500 | 0.519 |

(*P<0.05，**P<0.01)
